# Supplementary material for: Environmental filtering and habitat (mis)matching of riverine invertebrate metacommunities
Source: bioRxiv or medRxiv preprint supplement (doi:10.1101/2022.04.09.487317), 2022-07-17
Supplement: Supplementary file [file media-1.pdf]

**Riverine community (dis)equilibrium  
Appendix**

**Table S1:** Seven trait categories and associated trait modalities used for evaluating functional trait diversity and assessing functional trait abundances. Traits were compiled from Poff et al. (2006).

|           | <b>Trait Category</b>    | <b>Modality</b>                                                                                          |
|-----------|--------------------------|----------------------------------------------------------------------------------------------------------|
| Dispersal | Dispersal                | (1) Low (< 1 km flight before oviposition)<br>(2) High (> 1 km flight before oviposition)                |
|           | Flying Strength          | (1) Nonflyer<br>(2) Weak flyer<br>(3) Strong flyer                                                       |
|           | Body Size                | (1) Small<br>(2) Medium<br>(3) Large                                                                     |
| Habitat   | Rheophily                | (1) Depositional<br>(2) Depositional-erosional<br>(3) Erosional                                          |
|           | Thermal Preference       | (1) Cold<br>(2) Cool-warm<br>(3) Warm                                                                    |
|           | Pollution Tolerance      | (1) Sensitive<br>(2) Intermediate<br>(3) Tolerant                                                        |
| Ecology   | Functional Feeding Group | (1) Collector-gatherer (including shredders*)<br>(2) Collector-filterer<br>(3) Herbivore<br>(4) Predator |

\*Only one shredder was retained in our dataset (*Lepidostoma*) and comprised less than 0.50% of total abundance.

## Riverine community (dis)equilibrium Appendix

**Table S2:** Summary statistics [mean (1 standard deviation)] for predictor variables used in the boosted regression tree (BRT) analyses. Ecoregions are abbreviated as: coastal plain = CPL, northern Appalachians = NAP, northern plain = NPL, southern Appalachians = SAP, southern plain = SPL, temperate plain = TPL, western mountains = WMT, upper Midwest = UMW, and xeric = XER. We selected seven environmental variables [total nitrogen ( $\mu\text{g L}^{-1}$ , Total N), total phosphorus ( $\mu\text{g L}^{-1}$ , Total P), dissolved organic carbon ( $\text{mg L}^{-1}$ , DOC), large woody debris ( $\text{m}^3$  per 100 m, LWD), natural streambed cover (proportion, NAT Cover), algal cover (proportion, ALG Cover), and macrophyte cover (proportion, AQM Cover)], four landscape variables [forested cover (% of basin area, % For), agricultural cover (% of basin area, % Ag), urban cover (% of basin area, % Urb), and impervious surface cover (% of basin area, % ISC)], and seven network [latitude, longitude, basin area ( $\text{km}^2$ ), mean annual flow ( $\text{m}^3 \text{s}^{-1}$ , Mean Flow), mean basin elevation (m, Mean Elevation), range of basin elevation (m, Range Elevation), and site centrality (distance to centroid in km, Centrality)] variables.

| Variable             | Ecoregion            |                    |                      |                      |                        |                      |                      |                     |                       |
|----------------------|----------------------|--------------------|----------------------|----------------------|------------------------|----------------------|----------------------|---------------------|-----------------------|
|                      | CPL                  | NAP                | NPL                  | SAP                  | SPL                    | TPL                  | UMW                  | WMT                 | XER                   |
| <b>Environmental</b> |                      |                    |                      |                      |                        |                      |                      |                     |                       |
| Total N              | 1283.29<br>(1810.43) | 664.01<br>(838.80) | 1314.80<br>(4167.53) | 1046.70<br>(2309.52) | 1809.89<br>(3422.72)   | 3558.77<br>(4082.09) | 1558.52<br>(1922.09) | 251.54<br>(601.52)  | 782.36<br>(2297.26)   |
| Total P              | 199.55<br>(336.10)   | 56.99<br>(114.48)  | 230.96<br>(584.58)   | 87.24<br>(195.46)    | 455.05<br>(1280.51)    | 238.53<br>(495.88)   | 150.54<br>(381.49)   | 126.42<br>(911.44)  | 166.96<br>(542.55)    |
| DOC                  | 10.08 (14.70)        | 4.02 (2.91)        | 7.85 (5.21)          | 2.37 (1.82)          | 4.48 (2.73)            | 5.57 (8.58)          | 9.41 (10.11)         | 1.93 (1.90)         | 2.94 (2.37)           |
| LWD                  | 2.61 (5.18)          | 5.37 (8.24)        | 1.13 (4.15)          | 4.82 (13.11)         | 2.83 (10.98)           | 3.96 (10.08)         | 3.52 (5.77)          | 6.30 (13.96)        | 1.15 (2.50)           |
| NAT Cover            | 0.39 (0.31)          | 0.54 (0.34)        | 0.21 (0.24)          | 0.37 (0.21)          | 0.24 (0.22)            | 0.23 (0.18)          | 0.29 (0.19)          | 0.52 (0.40)         | 0.40 (0.37)           |
| ALG Cover            | 0.04 (0.12)          | 0.04 (0.09)        | 0.05 (0.13)          | 0.01 (0.04)          | 0.06 (0.13)            | 0.04 (0.10)          | 0.04 (0.10)          | 0.04 (0.09)         | 0.07 (0.14)           |
| AQM Cover            | 0.10 (0.17)          | 0.05 (0.09)        | 0.11 (0.18)          | 0.03 (0.07)          | 0.07 (0.16)            | 0.05 (0.16)          | 0.07 (0.14)          | 0.08 (0.14)         | 0.12 (0.18)           |
| <b>Landscape</b>     |                      |                    |                      |                      |                        |                      |                      |                     |                       |
| % For                | 39.64 (25.47)        | 65.69 (27.18)      | 8.76 (15.91)         | 62.23 (25.61)        | 12.42 (16.59)          | 9.78 (15.66)         | 38.20 (24.42)        | 65.86 (21.74)       | 31.29 (26.64)         |
| % Ag                 | 24.69 (26.66)        | 15.48 (22.07)      | 18.60 (21.58)        | 20.34 (21.66)        | 26.56 (25.55)          | 72.16 (24.71)        | 31.68 (29.80)        | 0.34 (1.07)         | 1.78 (5.17)           |
| % Urb                | 11.65 (19.86)        | 9.29 (15.47)       | 1.72 (1.45)          | 11.45 (18.96)        | 4.41 (6.37)            | 8.08 (12.88)         | 7.07 (14.59)         | 1.37 (2.53)         | 1.59 (3.56)           |
| % ISC                | 2.80 (7.35)          | 2.12 (4.43)        | 0.29 (0.17)          | 2.31 (5.54)          | 0.83 (2.75)            | 1.55 (3.80)          | 1.52 (5.86)          | 0.24 (0.49)         | 0.42 (0.95)           |
| <b>Network</b>       |                      |                    |                      |                      |                        |                      |                      |                     |                       |
| Latitude             | 33.71 (3.37)         | 42.79 (3.37)       | 45.45 (1.63)         | 36.80 (2.10)         | 37.21 (3.39)           | 41.35 (2.79)         | 44.91 (1.71)         | 41.71 (4.34)        | 39.42 (3.25)          |
| Longitude            | -86.09 (6.84)        | -74.88 (3.84)      | -103.84 (3.30)       | -83.95 (5.53)        | -99.71 (2.59)          | -92.30 (4.37)        | -89.63 (3.25)        | -114.35 (6.27)      | -114.09 (4.42)        |
| Basin Area           | 74.44<br>(260.34)    | 79.45<br>(226.01)  | 4423.64<br>(7566.12) | 171.52<br>(638.19)   | 15335.91<br>(28135.59) | 525.25<br>(1715.87)  | 243.81<br>(567.93)   | 688.62<br>(1755.52) | 5671.01<br>(20665.27) |
| Mean Flow            | 0.83 (2.63)          | 1.23 (3.31)        | 1.57 (3.74)          | 2.20 (8.37)          | 18.62 (50.78)          | 0.85 (1.50)          | 1.30 (2.29)          | 1.88 (4.73)         | 7.12 (18.97)          |
| Mean Elevation       | 71.42<br>(46.25)     | 373.20<br>(178.08) | 1089.50<br>(451.04)  | 358.49<br>(232.92)   | 996.35<br>(655.02)     | 319.56<br>(95.01)    | 336.65<br>(80.00)    | 1965.92<br>(859.14) | 1957.40<br>(559.95)   |
| Range Elevation      | 42.84<br>(39.73)     | 285.52<br>(261.51) | 665.34<br>(585.38)   | 237.58<br>(246.51)   | 1058.55<br>(1271.65)   | 85.99<br>(71.80)     | 94.89<br>(66.57)     | 982.02<br>(595.57)  | 1383.13<br>(728.23)   |
| Centrality           | 626.61 (208.16)      | 566.39 (196.10)    | 456.08 (160.82)      | 601.24 (209.48)      | 579.67 (214.03)        | 650.70 (227.91)      | 727.24 (217.67)      | 620.51 (227.77)     | 683.80 (225.49)       |

**Riverine community (dis)equilibrium  
Appendix**

**Table S3:** Summary of the ANCOVAs comparing environmental filtering against functional trait diversity [functional richness (FRic), functional evenness (FEve), functional divergence (FDiv) and functional dispersion (FDis)]. We report the degrees of freedom (df), F-statistics calculated from type III sums-of-squares, and the effect size (partial eta-squared,  $\eta^2_p$ ) for each term in the ANCOVAs.

| <b>Term</b>             | <b>df</b> | <b>F</b> | <b>P-value</b> | <b><math>\eta^2_p</math></b> |
|-------------------------|-----------|----------|----------------|------------------------------|
| <b>FRic</b>             |           |          |                |                              |
| FRic                    | 1         | 0.075    | 0.784          | 0.000                        |
| Ecoregion               | 8         | 77.853   | < 0.001        | 0.380                        |
| FRic $\times$ Ecoregion | 8         | 1.591    | 0.123          | 0.012                        |
| Residuals               | 1015      |          |                |                              |
| <b>FEve</b>             |           |          |                |                              |
| FEve                    | 1         | 0.256    | 0.613          | 0.000                        |
| Ecoregion               | 8         | 82.861   | < 0.001        | 0.392                        |
| FEve $\times$ Ecoregion | 8         | 0.544    | 0.823          | 0.004                        |
| Residuals               | 1027      |          |                |                              |
| <b>FDiv</b>             |           |          |                |                              |
| FDiv                    | 1         | 0.076    | 0.783          | 0.000                        |
| Ecoregion               | 8         | 77.745   | < 0.001        | 0.377                        |
| FDiv $\times$ Ecoregion | 8         | 2.256    | 0.022          | 0.017                        |
| Residuals               | 1027      |          |                |                              |
| <b>FDis</b>             |           |          |                |                              |
| FDis                    | 1         | 0.001    | 0.979          | 0.000                        |
| Ecoregion               | 8         | 93.792   | < 0.001        | 0.418                        |
| FDis $\times$ Ecoregion | 8         | 0.244    | 0.982          | 0.002                        |
| Residuals               | 1046      |          |                |                              |

**Riverine community (dis)equilibrium  
Appendix**

**Table S4:** Summary of the ANCOVAs comparing habitat matching against functional trait diversity [functional richness (FRic), functional evenness (FEve), functional divergence (FDiv) and functional dispersion (FDis)]. We report the degrees of freedom (df), F-statistics calculated from type III sums-of-squares, and the effect size (partial eta-squared,  $\eta^2_P$ ) for each term in the ANCOVAs.

| <b>Term</b>      | <b>df</b> | <b>F</b> | <b>P-value</b> | <b><math>\eta^2_P</math></b> |
|------------------|-----------|----------|----------------|------------------------------|
| <b>FRic</b>      |           |          |                |                              |
| FRic             | 1         | 2.373    | 0.124          | 0.002                        |
| Ecoregion        | 8         | 7.915    | < 0.001        | 0.059                        |
| FRic × Ecoregion | 8         | 7.388    | < 0.001        | 0.055                        |
| Residuals        | 1015      |          |                |                              |
| <b>FEve</b>      |           |          |                |                              |
| FEve             | 1         | 4.277    | 0.039          | 0.004                        |
| Ecoregion        | 8         | 3.276    | 0.001          | 0.025                        |
| FEve × Ecoregion | 8         | 4.337    | < 0.001        | 0.033                        |
| Residuals        | 1027      |          |                |                              |
| <b>FDiv</b>      |           |          |                |                              |
| FDiv             | 1         | 6.092    | 0.014          | 0.006                        |
| Ecoregion        | 8         | 1.802    | 0.073          | 0.014                        |
| FDiv × Ecoregion | 8         | 2.322    | 0.018          | 0.018                        |
| Residuals        | 1027      |          |                |                              |
| <b>FDis</b>      |           |          |                |                              |
| FDis             | 1         | 0.968    | 0.325          | 0.001                        |
| Ecoregion        | 8         | 0.669    | 0.719          | 0.005                        |
| FDis × Ecoregion | 8         | 0.695    | 0.696          | 0.005                        |
| Residuals        | 1046      |          |                |                              |



## Riverine community (dis)equilibrium Appendix

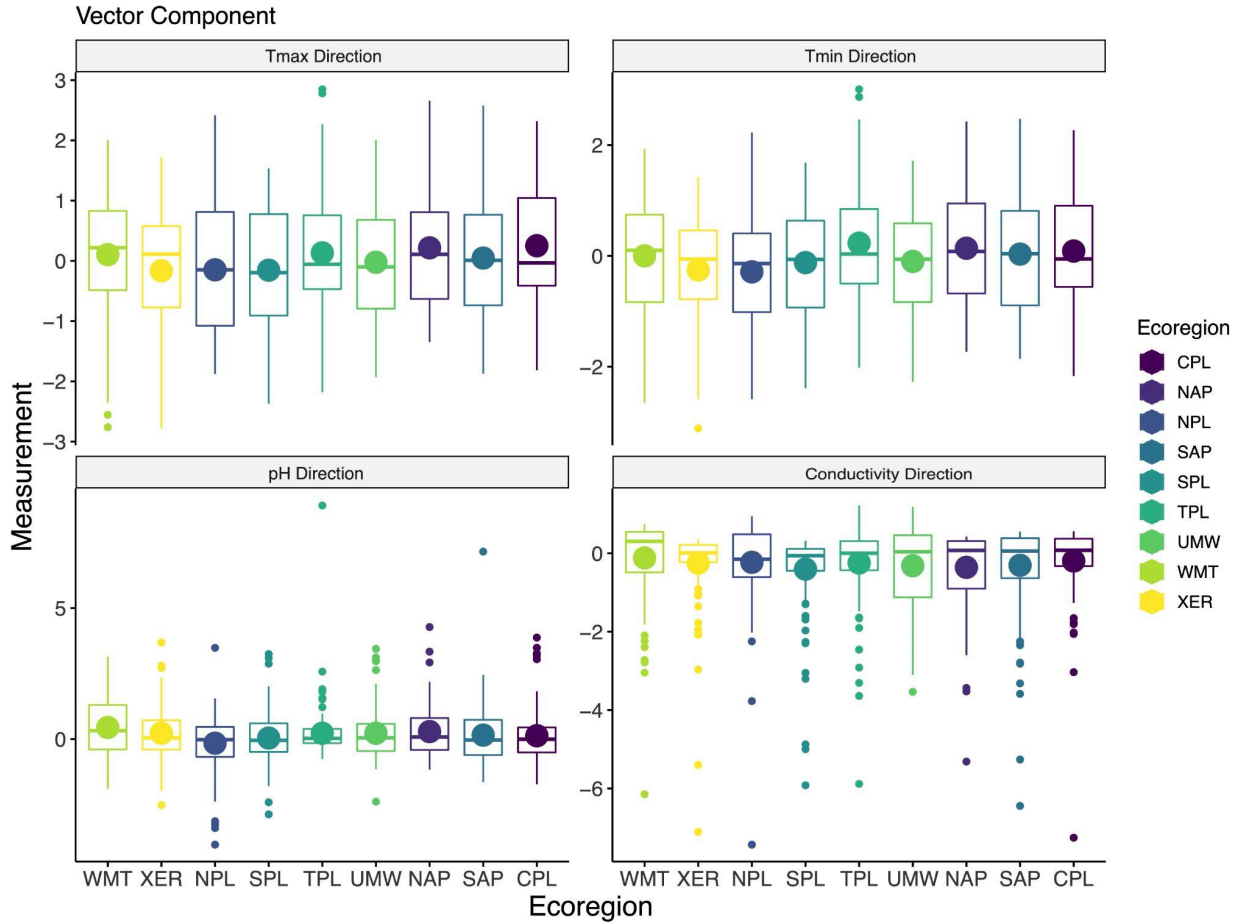

**Figure S1:** Facet plot of habitat matching vector components by ecoregion (Tmax = maximum temperature, Tmin = minimum temperature, pH, and conductivity). Large circles represent the mean and boxplots display the interquartile range (0.25, 0.75), minimum, and maximum, with smaller circles indicating outliers. Negative values indicate habitat matching and positive values indicate habitat mismatch. Ecoregions are arranged on the x-axis in approximate position based on longitude.

## Riverine community (dis)equilibrium Appendix

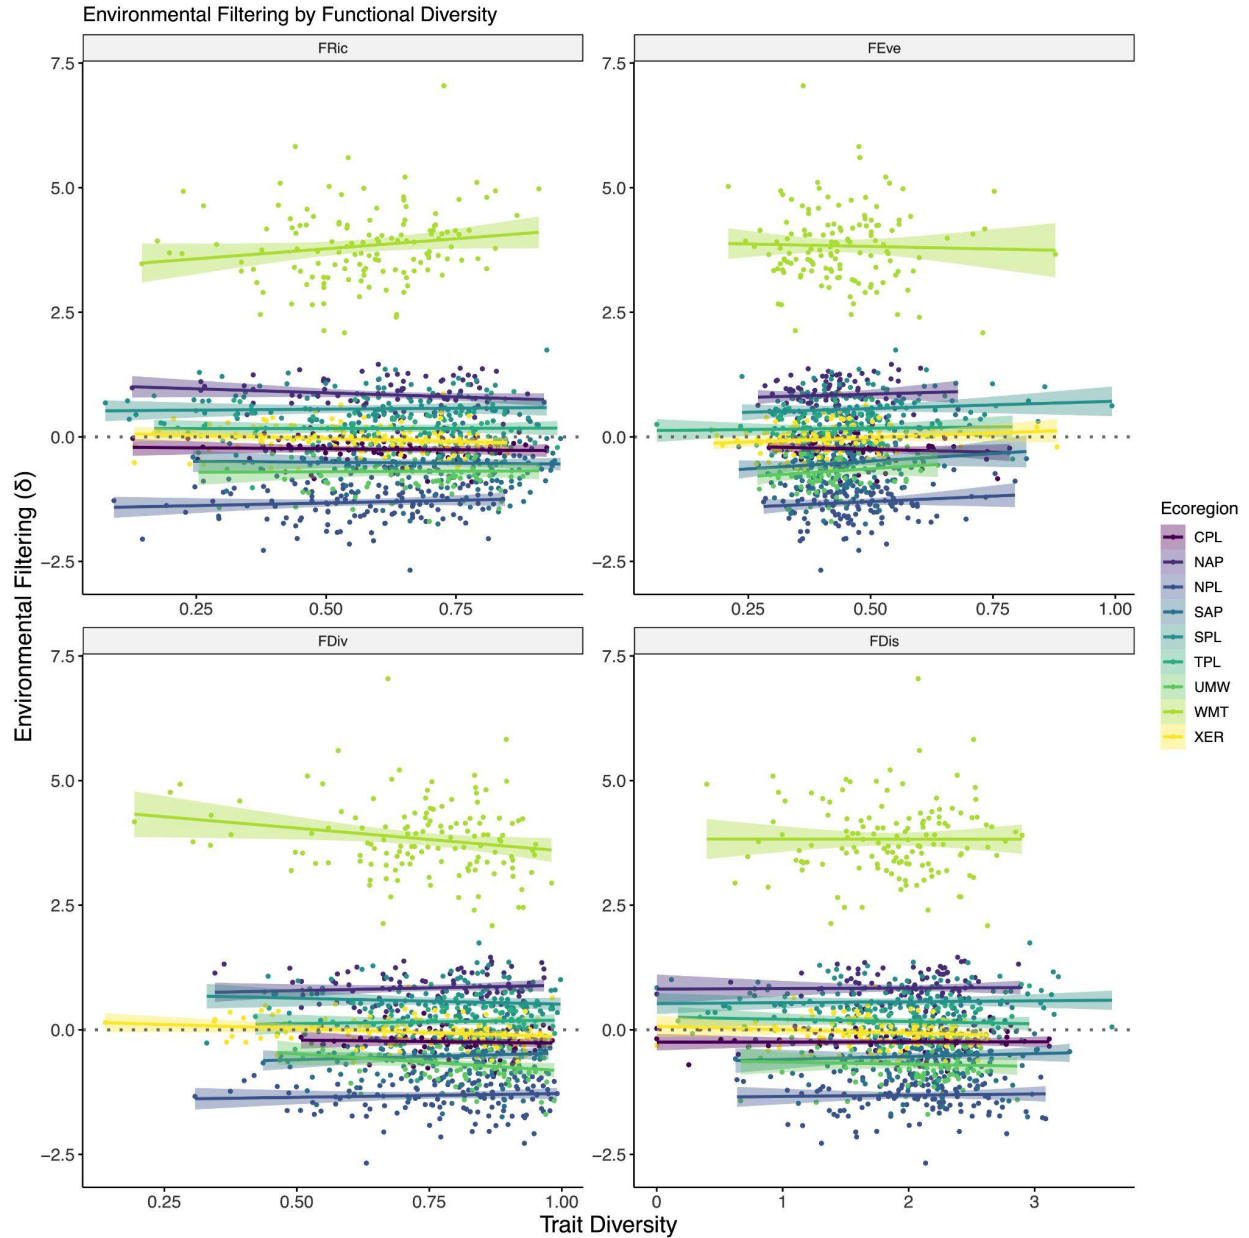

**Figure S2:** Facet plot of environmental filtering against functional richness (FRic), functional evenness (FEve), functional divergence (FDiv) and functional dispersion (FDis), with separate lines for each ecoregion. Lines are lines-of-best fit ( $\pm$  95% confidence interval) from ANCOVA models, allowing the slope and intercept to vary by ecoregion. Negative values indicate environmental filtering and positive values indicate environmental permissiveness. Model statistics are provided in Appendix Table S3.

# Riverine community (dis)equilibrium Appendix

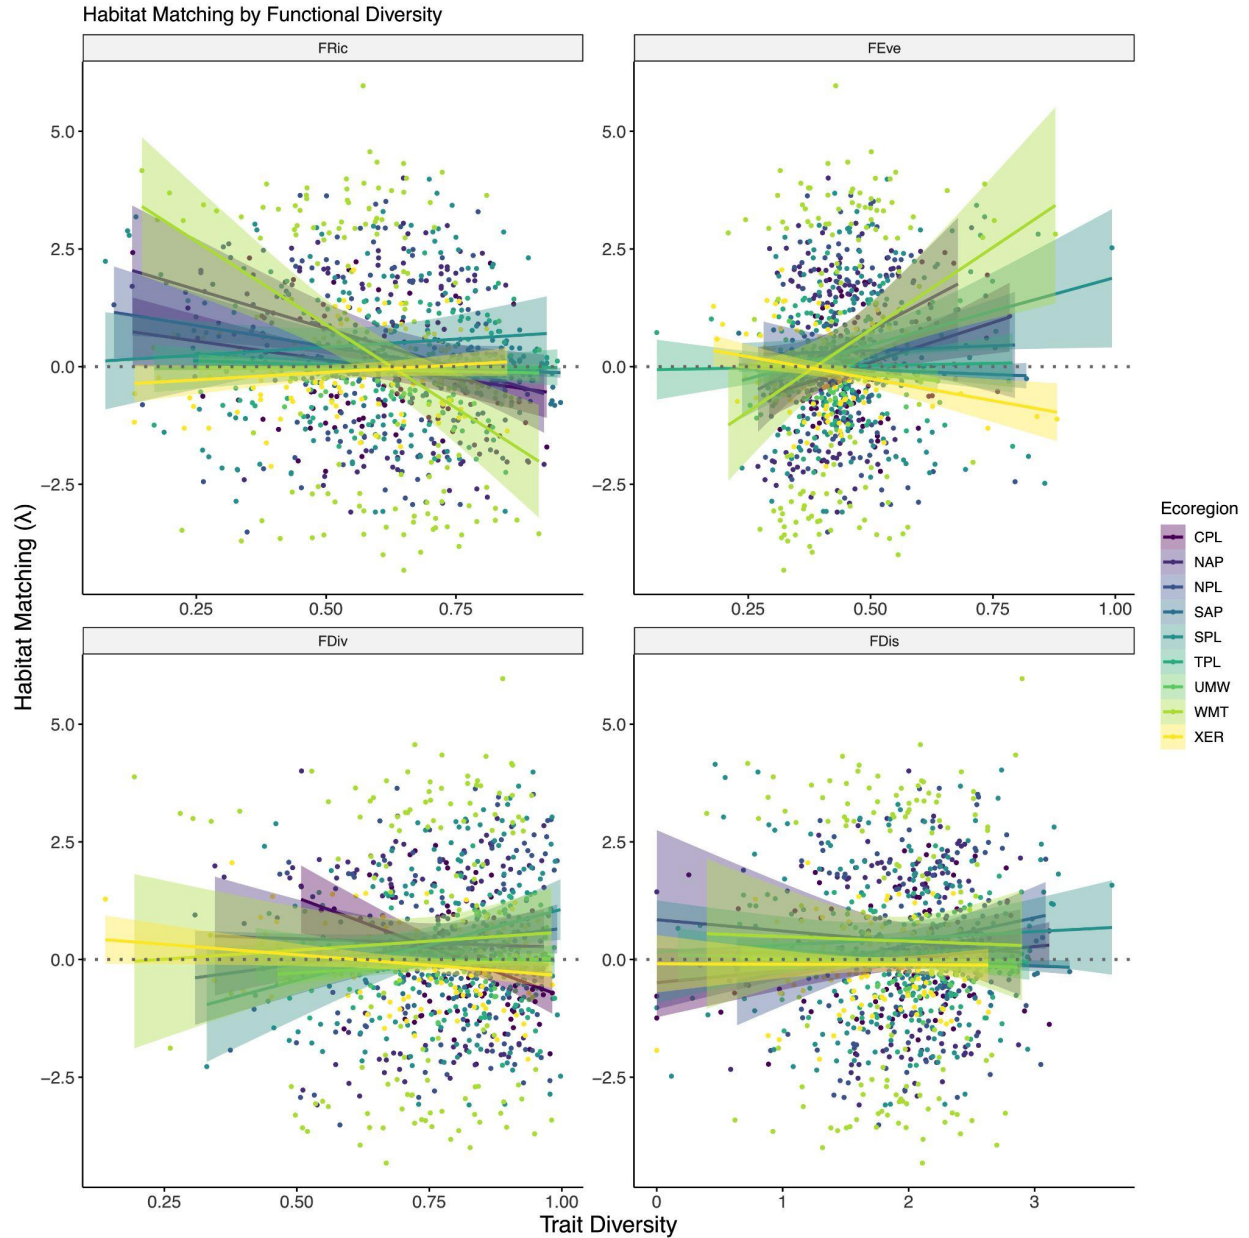

**Figure S3:** Facet plot of habitat matching against functional richness (FRic), functional evenness (FEve), functional divergence (FDiv) and functional dispersion (FDis), with separate lines for each ecoregion. Lines are lines-of-best fit ( $\pm$  95% confidence interval) from ANCOVA models, allowing the slope and intercept to vary by ecoregion. Negative values indicate environmental filtering and positive values indicate environmental permissiveness. Model statistics are provided in Appendix Table S4.

## Riverine community (dis)equilibrium Appendix

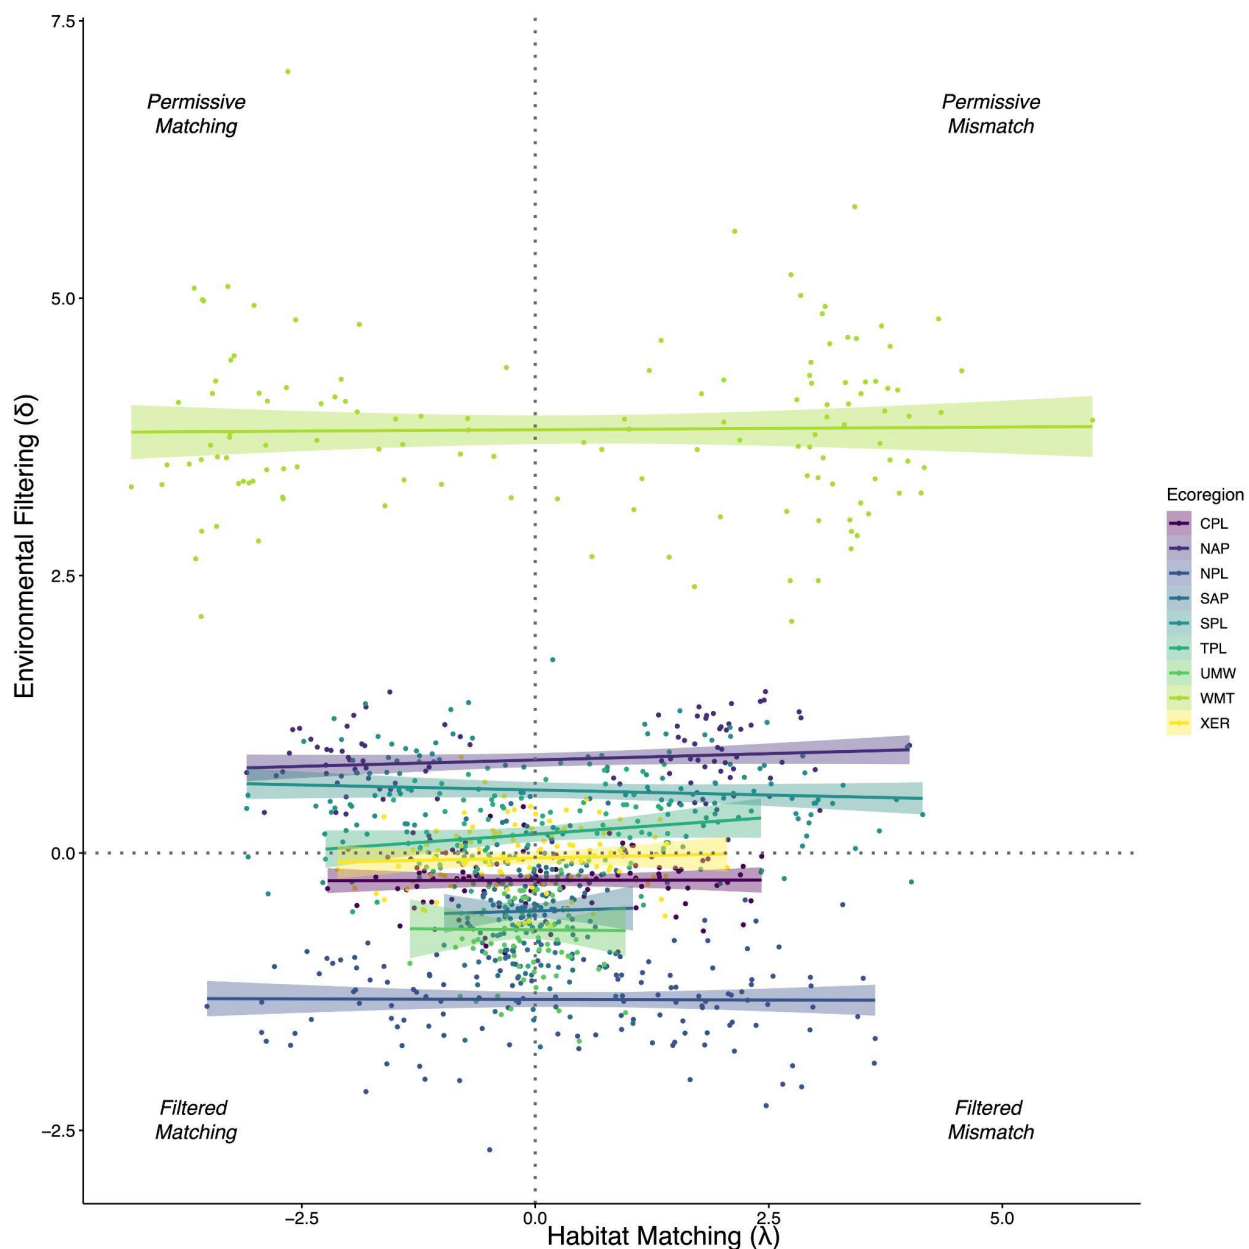

**Figure S4:** Plot of environmental filtering against habitat matching, with separate lines for each ecoregion. Lines are lines-of-best fit ( $\pm$  95% confidence interval) from a linear mixed-effects model, whereby environmental filtering was regressed against habitat matching and ecoregion was fitted as a random intercept; we allowed slopes to vary in the figure to aid in interpretation. There was no relationship between environmental filtering and habitat matching ( $\beta = 0.005$ , standard error = 0.008,  $df = 1068.026$ ,  $t = 0.554$ ), with ecoregion explaining the majority of the variation ( $R^2 \cong 0.90$ ). We fitted the linear mixed-effects model using `lmer()` in the `lme4` (Bates et al., 2015) and `lmerTest` (Kuznetsova et al., 2017) packages, with model assumptions evaluated using `check_model()` in the `performance` package (Lüdtke et al., 2021).

## Riverine community (dis)equilibrium Appendix

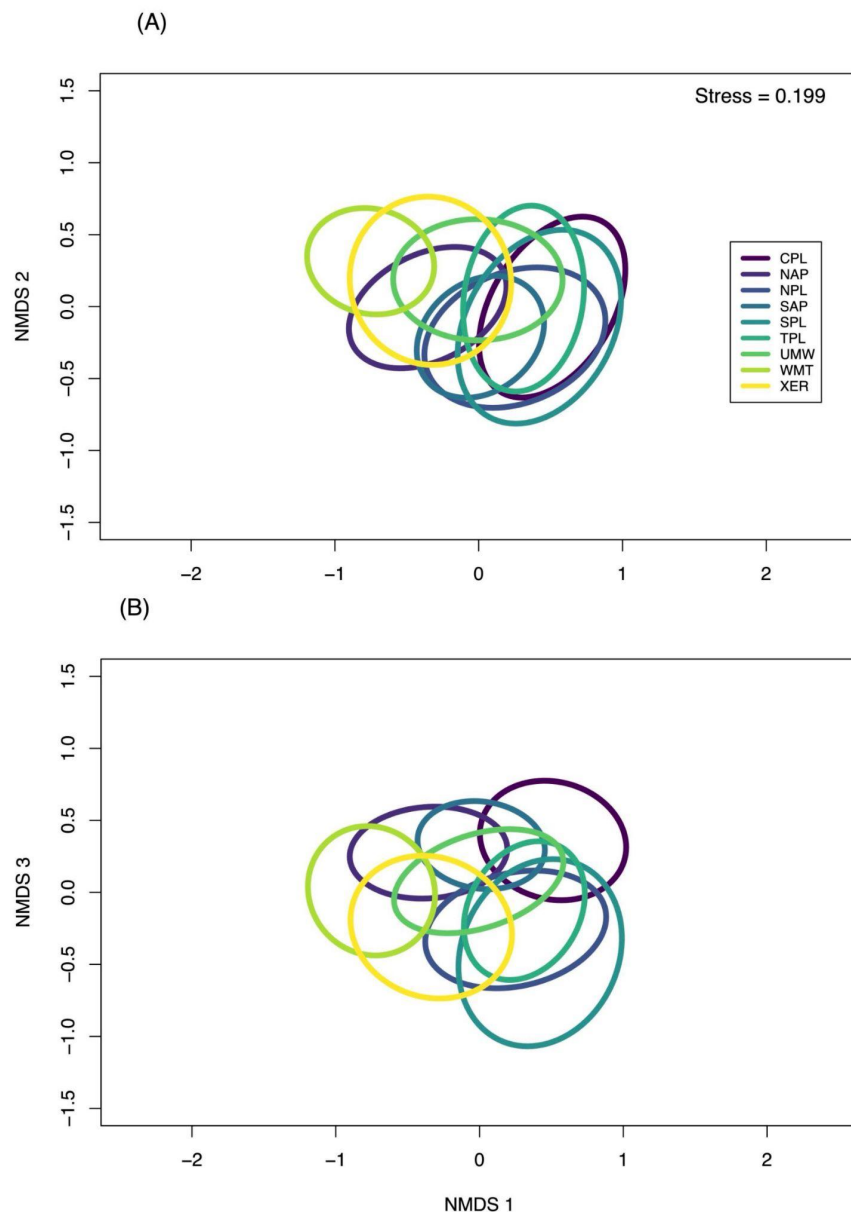

**Figure S5:** Non-metric multi-dimensional scaling plot of the Bray-Curtis dissimilarity of macroinvertebrate community composition among ecoregions. Three dimensions were required to achieve adequate stress in ordination space, and dimensions 1 and 2 are presented in panel (A) and dimensions 1 and 3 are presented in panel (B); dimension 1 is held constant on the x-axis for reference. Each ecoregion displayed a distinct community composition. (PERMANOVA,  $R^2 = 0.083$ ,  $P < 0.001$ ). We conducted the PERMANOVA with 10000 permutations using the `adonis()` function (Oksanen et al., 2020).

## Riverine community (dis)equilibrium Appendix

### References

- Bates, D., Mächler, M., Bolker, B., & Walker, S. (2015). Fitting linear mixed-effects models using lme4. *Journal of Statistical Software*, 67(1), 1–48. <https://doi.org/10.18637/jss.v067.i01>
- Kuznetsova, A., Brockhoff, P. B., & Christensen, R. H. B. (2017). lmerTest package: Tests in linear mixed effects models. *Journal of Statistical Software*, 82(13), Article 13. <https://doi.org/10.18637/jss.v082.i13>
- Lüdtke, D., Ben-Shachar, M., Patil, I., Waggoner, P., & Makowski, D. (2021). performance: An R Package for Assessment, Comparison and Testing of Statistical Models. *Journal of Open Source Software*, 6(60), 3139. <https://doi.org/10.21105/joss.03139>
- Oksanen, J., Blanchet, F. G., Friendly, M., Kindt, R., Legendre, P., McGlinn, D., Minchin, P. R., O'Hara, R. B., Simpson, G. L., Solymos, P., Stevens, M. H. H., Szoecs, E., & Wagner, H. (2020). *vegan: Community Ecology Package (2.5-7)*. <https://CRAN.R-project.org/package=vegan>
- Poff, N. L., Olden, J. D., Vieira, N. K. M., Finn, D. S., Simmons, M. P., & Kondratieff, B. C. (2006). Functional trait niches of North American lotic insects: Traits-based ecological applications in light of phylogenetic relationships. *Journal of the North American Benthological Society*, 25(4), 730–755. [https://doi.org/10.1899/0887-3593\(2006\)025\[0730:FTNONA\]2.0.CO;2](https://doi.org/10.1899/0887-3593(2006)025[0730:FTNONA]2.0.CO;2)
